# Supplementary material for: MYTHO is a novel regulator of skeletal muscle autophagy and integrity
Source: PubMed Central journal article supplement (PMC9981687; doi:10.1038/s41467-023-36817-1), 2023-03-02
Supplement: 41467_2023_36817_MOESM1_ESM.pdf [file 41467_2023_36817_MOESM1_ESM.pdf]

# MYTHO IS A NOVEL REGULATOR OF SKELETAL MUSCLE AUTOPHAGY AND INTEGRITY

## Supplementary figures and legends

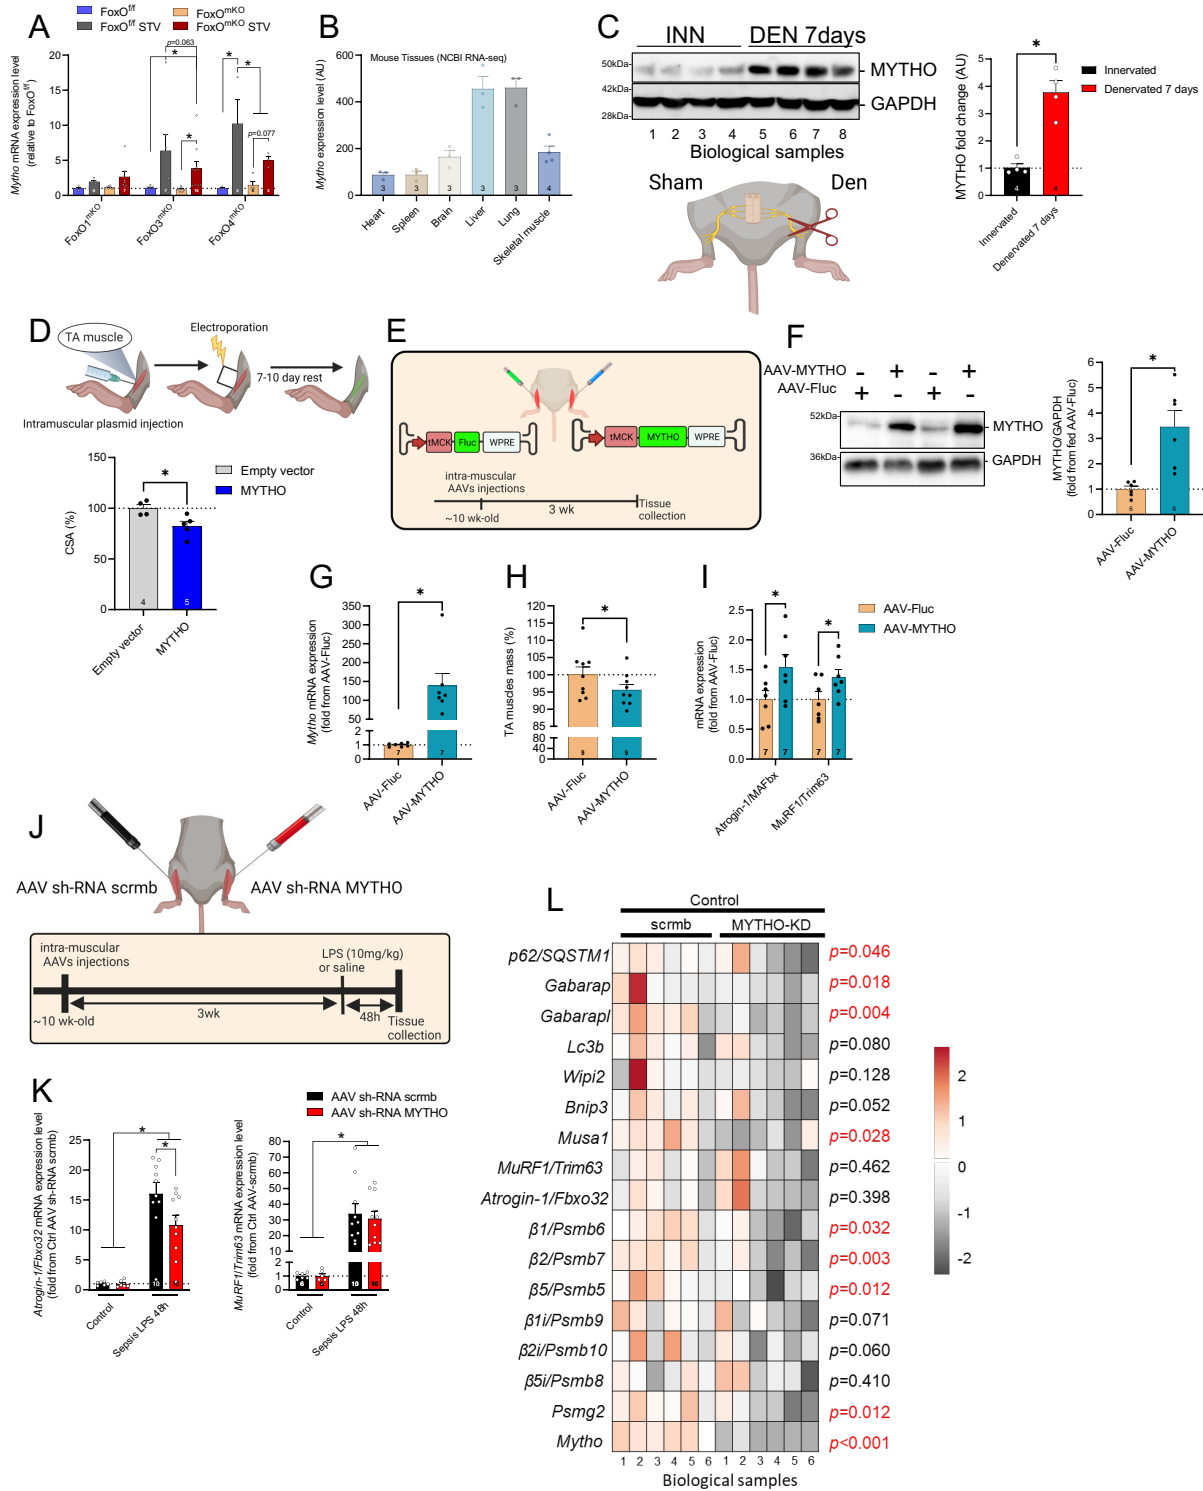

**Figure S1: Mytho is expressed in various tissues and is upregulated in catabolic conditions.** A Quantification of *Mytho* mRNA levels assessed using RT-qPCR in the TA of fed and 24-h starved FoxO1<sup>fl/fl</sup>, FoxO3<sup>fl/fl</sup>, FoxO4<sup>fl/fl</sup>,

FoxO1<sup>-/- mKO</sup>, FoxO3<sup>-/- mKO</sup> and FoxO4<sup>-/- mKO</sup> mice. Results are shown as fold increase from FoxO<sup>fl/fl</sup> Fed. GAPDH was used as housekeeping gene. **B** Microarray analysis from a publicly available GEO data set (accession number: [GSE24207](#)) showing *Mytho* expression in various tissues. **C** Immunoblot analysis of MYTHO from homogenates of denervated or innervated TA muscles. GAPDH was used as loading control. All values are expressed relative to innervated TA muscles. **D** Adult TA muscles were transfected with pBI-GFP (one leg) or pBI-GFP 3xflag MYTHO (contralateral leg). After 7 to 10 days, cross-sectional area of transfected fibers was quantified. **E** Schematic representation of the experimental design: TA muscles were transduced with AAV-Fluc and AAV-MYTHO and muscles were examined 3 weeks later in Fed or 48h starved mice. **F-G** MYTHO protein content (**F**) and mRNA expression (**G**) were quantified by immunoblotting and RT-qPCR, respectively. **H** Analysis of TA muscle mass (shown as % of AAV-fluc). **I** Quantification of *Murfl* and *Atrogin1* gene expression by RT-qPCR. Data is shown as fold increase from AAV fluc. **J** Schematic representation of the experimental design. TA muscles were transfected with either AAV sh-RNA scramble or AAV sh-RNA MYTHO. Transduced muscles were examined 3 weeks later. **K** *Murfl* and *Atrogin1* mRNA expression levels were assessed by RT-qPCR in TA samples from control and septic (LPS-injected) mice. Data is shown as fold-increase from AAV sh-RNA scramble. **L** Heatmap showing mRNA expression levels of genes regulating catabolic signaling in TA muscles 3 weeks post transfection as determined by RT-qPCR. Colors indicate relative expression levels; red indicates high expression and gray indicates low expression. Data are presented as mean ± SEM (with individual values) and the number of independent biological replicates is indicated within bars. Data in **A** and **K** were analyzed with two-way ANOVA and corrections for multiple comparisons were performed with the two-stage step-up method of Benjamini, Krieger and Yekutieli (\*p < 0.05 and q < 0.1). Comparisons in **C**, **D**, **F**, **G**, **H**, **I** were performed using paired two-tailed t-test (\*p < 0.05). Comparisons in **L** were performed using paired one-tailed t-tests (\*p < 0.05). Detailed information on raw data, statistical tests, p-values and q-values are provided in the Source Data file. The drawings in **C**, **D**, **E** and **J** were created with BioRender.com.

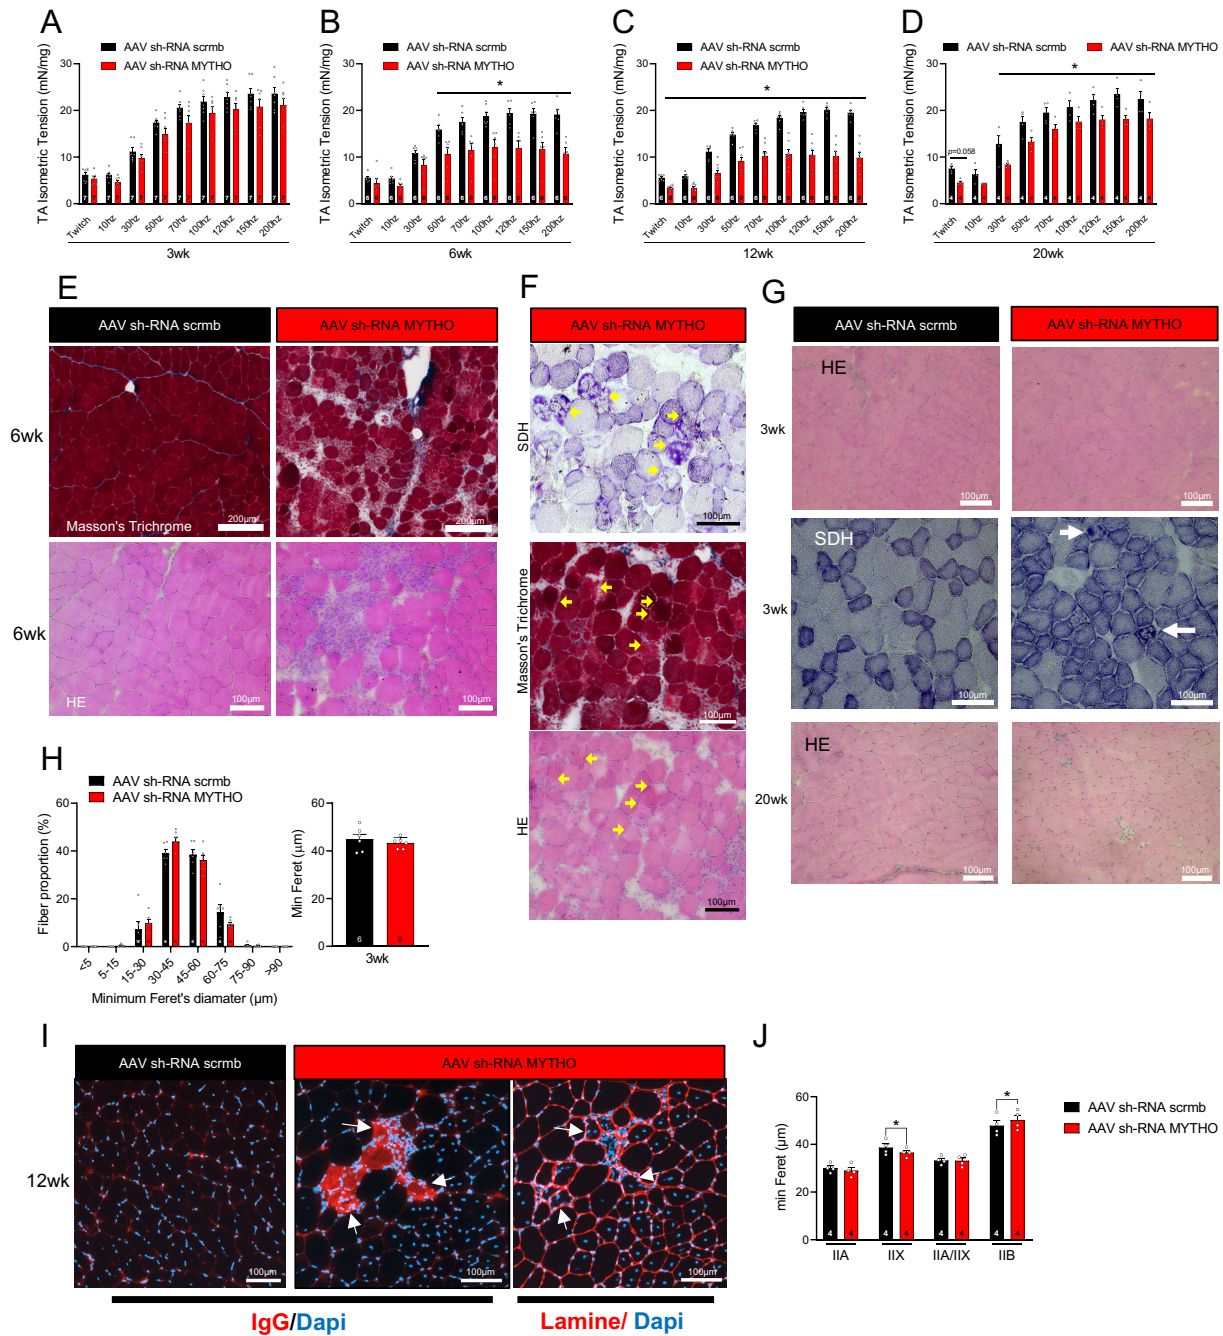

**Figure S2. MYTHO regulates muscle mass, fiber-type composition and anabolic signaling in mice.** A-D TA isometric tension measured *in situ* at 3, 6, 12 and 20 weeks post injection of AAV sh-RNA scramble or AAV sh-RNA MYTHO (data were analysed with two-way ANOVA with Benjamini, Krieger and Yekutieli multiple comparisons test:  $*=p < 0.05$  and  $q < 0.1$ ). E Representative images of Masson's trichrome staining (upper panel) and H&E staining (lower panel) at 6 weeks post injection of AAV sh-RNA scramble or AAV sh-RNA MYTHO ( $n=6$  mice per group). Scale bars: 200 μm for upper panel, 100 μm for lower panel. F SDH, Masson's trichrome and H&E staining of the same muscle area at 6 weeks AAV posttransduction ( $n=6$  mice per group). Yellow arrows indicate myofiber abnormalities (ragged blue fibers, miofiber necrosis and small regenerating fibers). Scale bars:

100  $\mu\text{m}$ . **G** Representative images of H&E and SDH staining at 3 weeks (n=6 mice per group) or 20 weeks (n=4 mice per group) post injection of AAV shRNA scramble or MYTHO. White arrows indicate rare abnormalities in myofibers at 3 weeks posttransduction. Scale bar: 50 $\mu\text{m}$ . **H** Analysis of fiber diameter in TA injected for 3 weeks with either AAV sh-RNA scramble or AAV sh-RNA MYTHO. Data in the graph on the left were analysed with two-way ANOVA with Benjamini, Krieger and Yekutieli multiple comparisons test (\*= $p < 0.05$  and  $q < 0.1$ ). Data in the graph on the right were analysed with a paired two-tailed t-test (\*= $p < 0.05$ ). **I** Representative images of IgG, laminin and DAPI immunostaining of TA at 3 weeks post injection of AAV sh-RNA scramble or AAV-shRNA MYTHO (n=8 mice per group). White arrows indicate necrotic myofibers. Scale bars: 100  $\mu\text{m}$ . **J** Analysis of fiber type proportion in TA injected with either AAV sh-RNA scramble or AAV sh-RNA MYTHO for 12 weeks. (data were analysed with two-way ANOVA with Benjamini, Krieger and Yekutieli multiple comparisons test: \*= $p < 0.05$  and  $q < 0.1$ ). The number of mice for each group is indicated within bars. Data are presented as mean  $\pm$  SEM (with individual data). \*= $p < 0.05$  and  $q < 0.1$  when applicable. Detailed information on raw data, statistical tests, p-values and q-values are provided in the Source Data file.

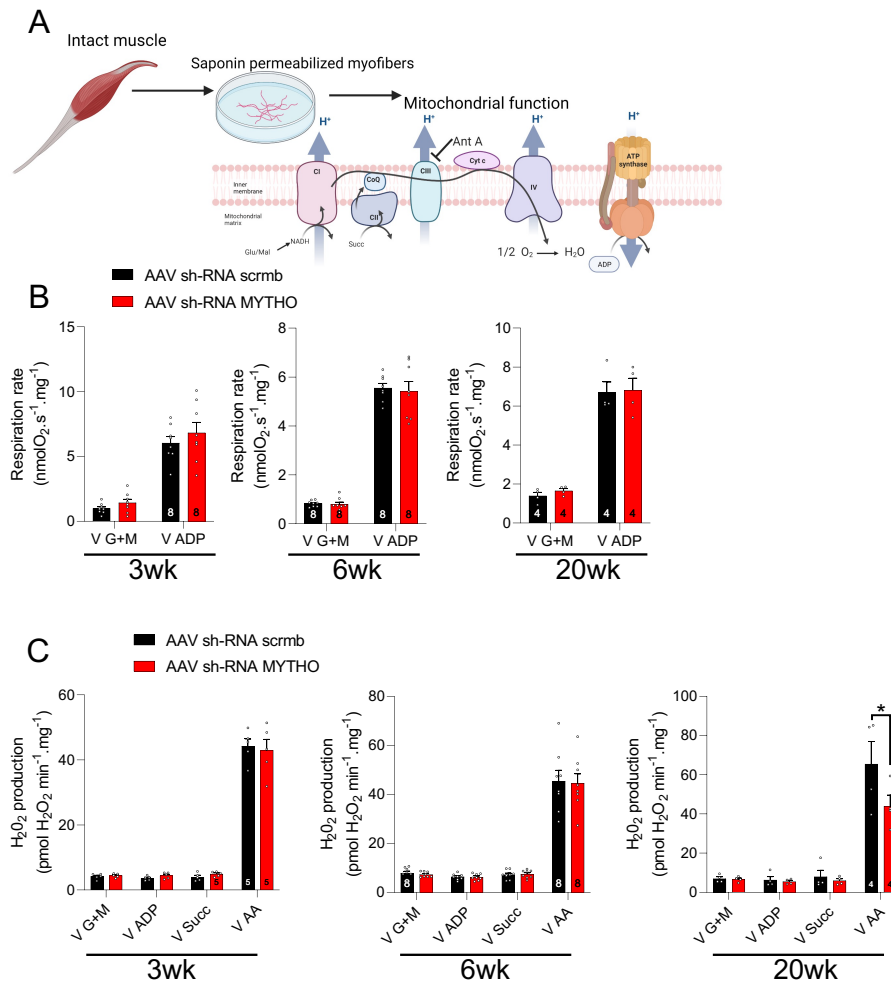

**Fig S3. MYTHO depletion does not impair mitochondrial respiration.** **A** Schematic representation of the experimental design. **B** Mitochondrial respiration analysis of GAS muscles transduced for 3, 6 or 20 weeks with AAV sh-RNA scramble or AAV sh-RNA MYTHO. V G+M: respiration rate driven by the addition of Glutamate and Malate. V ADP = respiration rate driven by the subsequent addition of ADP. **C** H<sub>2</sub>O<sub>2</sub> emission at 3, 6 and 20 weeks in muscles injected with AAV sh-RNA scramble or AAV sh-RNA MYTHO. V G+M: H<sub>2</sub>O<sub>2</sub> production rate driven by the addition of Glutamate and Malate. V ADP = H<sub>2</sub>O<sub>2</sub> production rate driven by the subsequent addition of ADP. V Succ: H<sub>2</sub>O<sub>2</sub> production rate driven by the subsequent addition of Succinate. V AA: H<sub>2</sub>O<sub>2</sub> production rate driven by the subsequent addition of Antimycin A. The number of mice for each group is indicated within bars. Data in **B** and **C** were analysed with two-way repeated measure ANOVA with Benjamini, Krieger and Yekutieli multiple comparisons test (\*= $p < 0.05$  and  $q < 0.1$ ). Data are presented as mean  $\pm$  SEM (with individual data). Detailed information on raw data, statistical tests, p-values and q-values are provided in the Source Data file. **A** was created with BioRender.com.

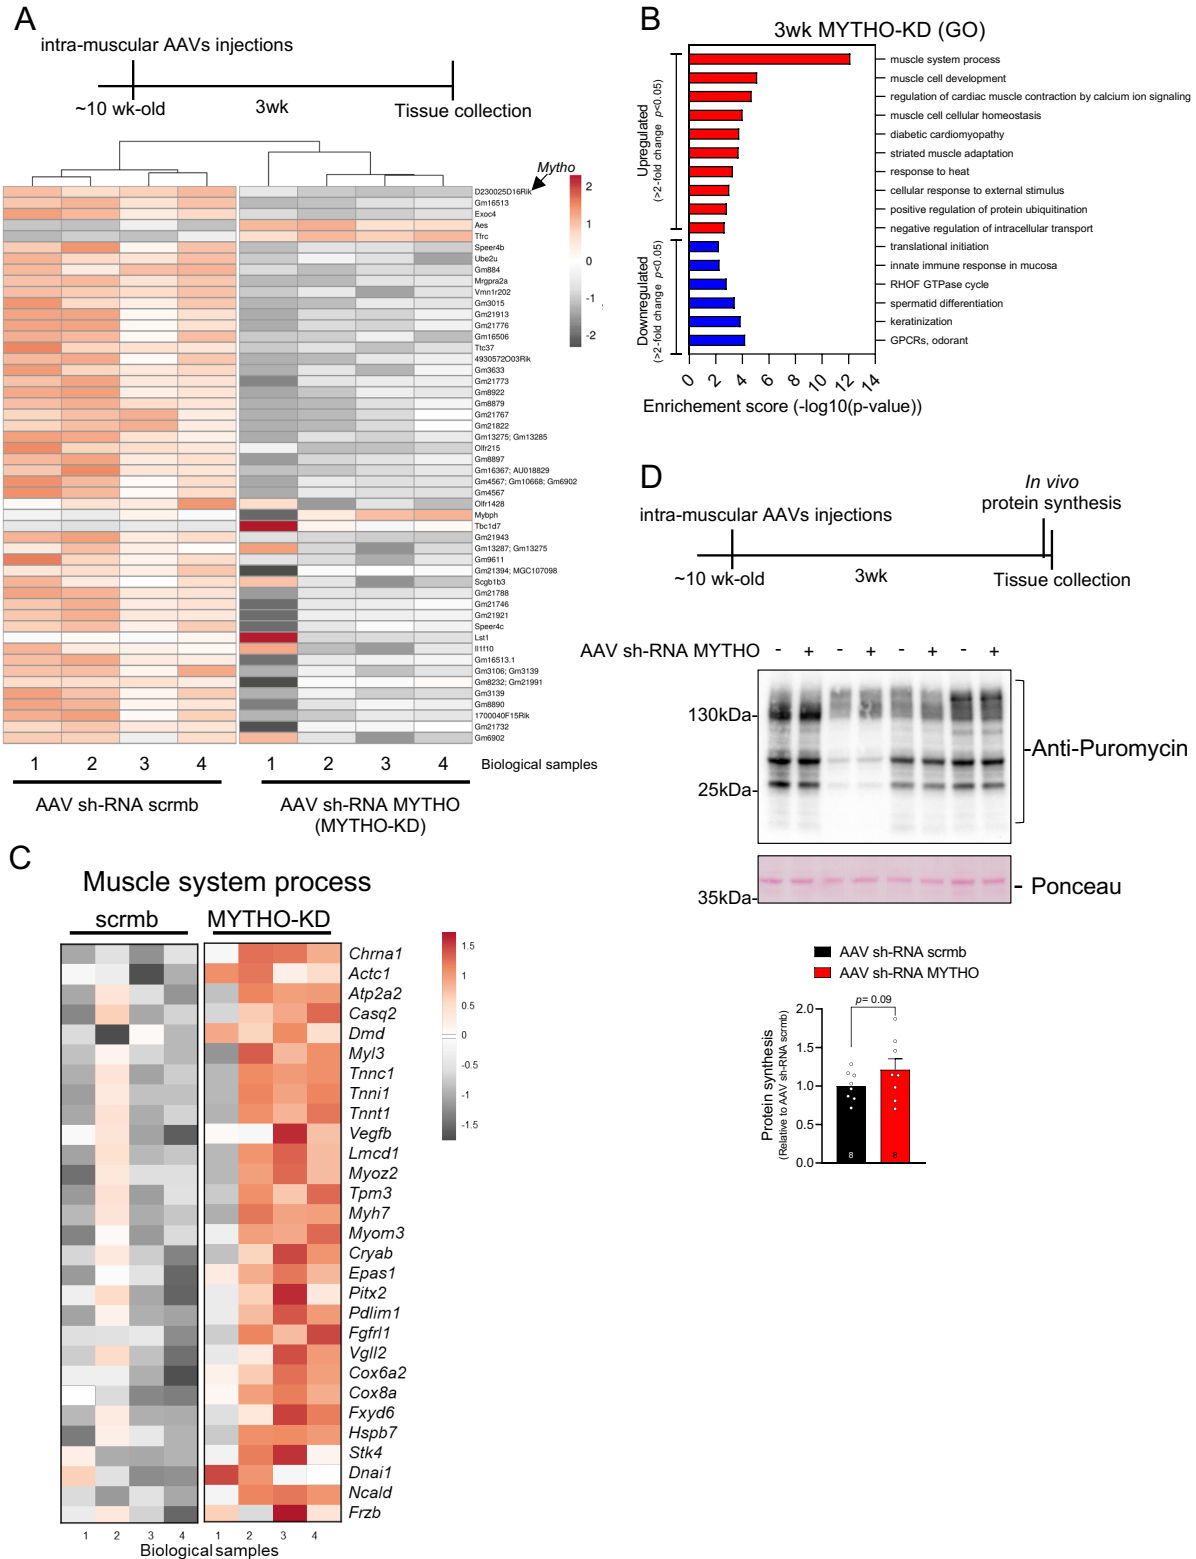

**Figure S4: MYTHO depletion activates growth signaling.** **A** Heatmap of the top 50 most robustly regulated genes (>2-fold change and  $p < 0.05$  and  $q < 0.1$ ) derived from microarray analysis of Gastrocnemius (GAS) muscle at 3 weeks post AAV sh-RNA scramble or AAV sh-RNA MYTHO injections. Colors indicate relative

expression levels; red indicates high expression and gray indicates low expression. **B** Top upregulated (red) and downregulated (blue) pathways as identified through GO enrichment analysis. **C** Heatmap of differentially expressed genes extracted from the GO annotation muscle system process. Upregulated genes in GAS injected with AAV sh-RNA MYTHO appear in red while downregulated genes appear in gray. **D** Representative immunoblot and corresponding quantification of puromycin incorporation in TA from AAV sh-RNA scramble and AAV sh-RNA MYTHO injected muscles at 3 weeks post transduction. Data are presented as fold-increase from AAV sh-RNA MYTHO. The number of mice for each group is indicated within bars. Data in **D** were analysed with a paired one tailed *t*-test. Data are presented as mean  $\pm$  SEM (with individual data). Detailed information on raw data, statistical tests, p-values and q-values are provided in the Source Data file.

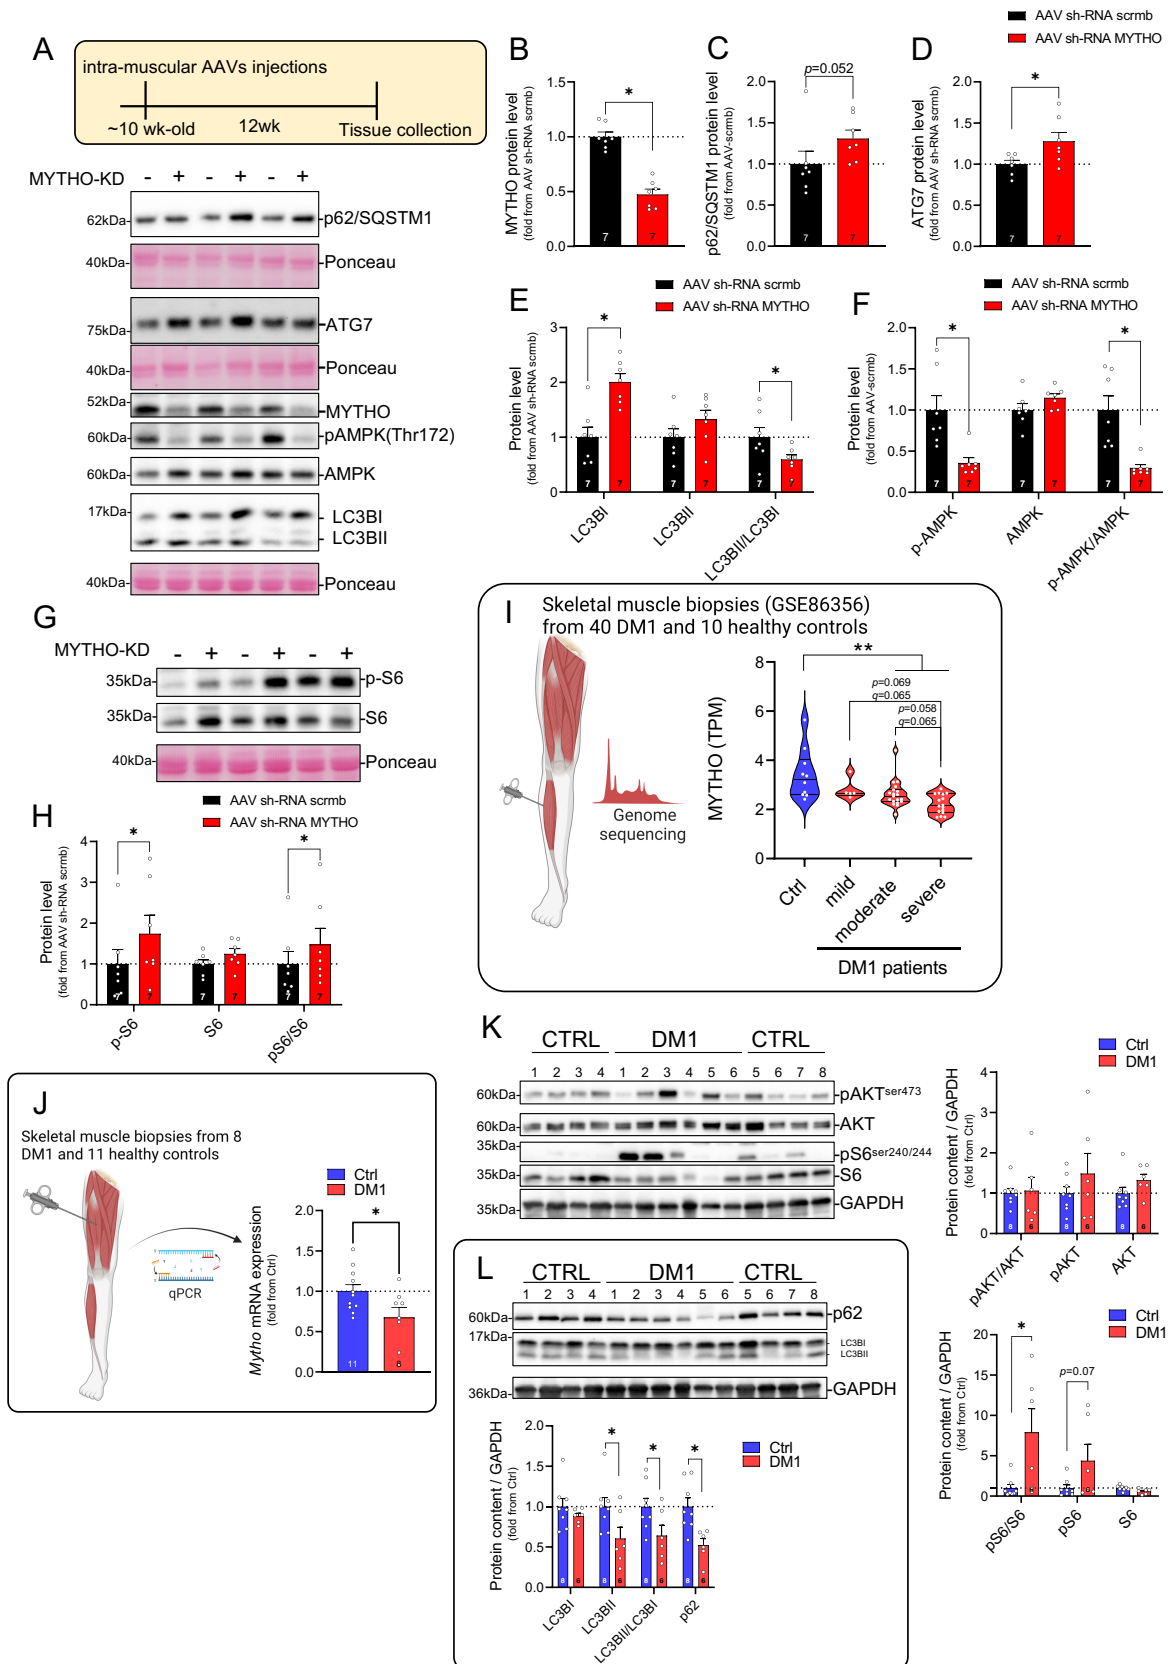

**Figure S5: MYTHO depletion activates growth signaling.** A-F Immunoblots performed on TA homogenates 20 weeks after the injection of AAV sh-RNA scramble or AAV sh-RNA MYTHO.



Quantification of MYTHO, p62, ATG7, LC3BI, LC3II, LC3II/ LC3I, pAMPK, AMPK and pAMPK/AMPK are shown in graphs **D** to **H**. Results are presented as fold increase from AAV sh-RNA scramble. **G-H** Immunoblots and corresponding quantifications of p-S6 and S6 content in TA homogenates transduced with AAV sh-RNA scramble or AAV sh-RNA MYTHO for 20 weeks. **I** *Mytho* transcript per million (TPM) in TA muscle from patients with mild, moderate and severe myotonic dystrophy type 1 (DM1) ([GSE86356](#)). **J** Quantification of *Mytho* gene expression by RT-qPCR in the *vastus lateralis* of patients with DM1 (5 females, 3 males; age: 51.8±4.0; CTG repeats: 476±59), compared to healthy samples (5 females, 6 males; age: 45.8±6.7). **K-L** Immunoblots and corresponding quantifications of pAKT, AKT, pS6, S6 and GAPDH in *vastus lateralis* homogenates of patients with DM1 (6 males; age 58.5±2.5; CTG repeats: 233.5±74.68) and healthy controls (8 males; age: 64.7±2.7). The number of participants/patients or mice for each group is indicated within bars. Data are presented as mean ± SEM (with individual data). \*= $p < 0.05$  and  $q < 0.1$  when applicable. Detailed information on raw data, statistical tests, p-values and q-values are provided in the Source Data file. The drawings in **A**, **I** and **J** were created with BioRender.com.

## Supplementary tables.

**Table S1: shRNA sequence used to downregulate *Mytho* expression.**

| Gene                                                     | Targeting sequence (5'-3')                                          |
|----------------------------------------------------------|---------------------------------------------------------------------|
| <i>D230025D16Rik</i><br>( <i>Mytho</i> )<br><i>shRNA</i> | TGCTGTAAGGATGAGGTCATGGCTTAGT<br>TTGGCCACTGACTGACTAAGCCATCCTCATCCTTA |

**Table S2: Primers used for *Mytho* cloning.**

| Gene                                     | Forward primer (5'-3')        | Reverse primer (3'-5')     |
|------------------------------------------|-------------------------------|----------------------------|
| <i>D230025D16Rik</i><br>( <i>Mytho</i> ) | AAAGCTAGCATGCTGGACCTGGAGGTGGT | TAAGGATCCGGGCAGCTCTGCTGTTC |

**Table S3: Antibodies used for *in situ* immunolabeling.**

| Antibody                                    | Source / Product no.    | Dilution | Analysis |
|---------------------------------------------|-------------------------|----------|----------|
| Mouse IgG2b monoclonal anti-MHC type I      | DSHB #BA-F8             | 1:25     | IF       |
| Mouse IgG1 mono- clonal anti-MHC type IIa   | DSHB #SC-71             | 1:200    | IF       |
| Mouse IgM monoclonal anti-MHC type IIb      | DSHB #BF-F3             | 1:200    | IF       |
| Rabbit polyclonal anti-laminin              | Sigma-Aldrich # L9393   | 1:750    | IF       |
| Mouse monoclonal anti-Stim1                 | BD Biosciences # 610954 | 1:200    | IF       |
| Mouse monoclonal anti-Serca2                | ThermoFisher, MA3-910   | 1:200    | IF       |
| Rat monoclonal 4/80 - Macrophage Marker     | Abcam #ab6640           | 1:100    | IF       |
| Alexa Fluor 350 IgG2b (y2b) goat anti-mouse | Invitrogen, A-21140     | 1:500    | IF       |
| Alexa Fluor 488 IgG goat anti-rabbit        | Invitrogen, A-11008     | 1:500    | IF       |
| Alexa Fluor 488 IgM goat anti-mouse         | Invitrogen, A-21042     | 1:500    | IF       |
| Alexa Fluor 594 IgG1 (y1) goat anti-mouse   | Invitrogen, A-21125     | 1:100    | IF       |
| Alexa Fluor 568 IgG goat anti-rat           | Invitrogen, A-11007     | 1:500    | IF       |
| Alexa Fluor 594 IgG goat anti-rabbit        | Invitrogen, A-11037,    | 1:500    | IF       |
| Alexa Fluor 568 IgG goat anti-rabbit        | ThermoFisher, A-11011   | 1:500    | IF       |

MHC: Myosin heavy chain; DSHB: Developmental Studies Hybridoma Bank (University of Iowa, IA).

**Table S4: Antibodies used for immunoblotting.**

| Antibody                                   | Source / Product no.                            | Dilution | Analysis |
|--------------------------------------------|-------------------------------------------------|----------|----------|
| Rabbit anti-Atg7                           | Cell signaling #8558                            | 1/1000   | WB       |
| AKT                                        | Cell signaling #9272                            | 1/1000   | WB       |
| p-AKT (Ser473)                             | Cell signaling #9271                            | 1/1000   | WB       |
| Rabbit anti-phospho AMPK $\alpha$ (Thr172) | Cell signaling #2535                            | 1/1000   | WB       |
| Rabbit anti-AMPK $\alpha$                  | Cell signaling #2532                            | 1/1000   | WB       |
| Rabbit anti-LC3                            | Cell signaling #12741                           | 1/1000   | WB       |
| Rabbit anti-LC3B                           | Sigma #L7543                                    | 1/1000   | WB       |
| Rabbit anti-GAPDH                          | Cell signaling # 2118                           | 1/2500   | WB       |
| Mouse anti-GAPDH                           | Santa Cruz #32233                               | 1/10000  | WB       |
| Mouse anti-Bnip3                           | Sigma-Aldrich #B7931                            | 1/1000   | WB       |
| Anti-puromycin, clone 12D10                | Millipore # MABE343                             | 1/2500   | WB       |
| Mouse anti-p62/SQSTM1                      | Novus Biologicals Inc. clone 2C11               | 1/1000   | WB       |
| Rabbit anti-C16orf70 (MYTHO)               | Abcam # 181987                                  | 1/1000   | WB       |
| Mouse anti-Desmin                          | D76 Developmental Studies Hybridoma Bank (DSHB) | 1/500    | WB       |
| Rabbit anti-phospho-S6 (Ser240/244)        | Cell signaling #2215                            | 1/1000   | WB       |
| Rabbit anti-total S6                       | Cell signaling #2217                            | 1/1000   | WB       |
| Goat anti mouse IgG                        | Abcam # Ab6728                                  | 1/5000   | WB       |
| Goat anti rabbit IgG                       | Abcam # Ab6721                                  | 1/5000   | WB       |

Further details about the validation of those antibodies above can be found in the Reporting Summary.

**Table S5: Primers used for qPCR.**

| Gene                                                       | Forward primer (5'-3')         | Reverse primer (3'-5') |
|------------------------------------------------------------|--------------------------------|------------------------|
|                                                            | <b>Mouse primers sequences</b> |                        |
| <i>D230025D16Rik</i><br>( <i>Mytho</i> )<br>Isoform201/203 | CGCTCCTACCATTGAGCAAA           | CCTCGGAAGTTGAGGTGGAA   |
| <i>Lc3b</i>                                                | CGATACAAGGGGGAGAAGCA           | ACTTCGGAGATGGGAGTGGAA  |
| <i>p62/Sqstm1</i>                                          | GCACCTGTCTGAGGGCTTCT           | GCTCCAGTTTCCTGGTGGAC   |
| <i>Bnip3</i>                                               | TTCCACTAGCACCTTCTGATGA         | GAACACCGCATTTACAGAACAA |
| <i>Gabarapl1</i>                                           | GAGGACCACCCCTTCG               | CGGAGGGCACAAGGTACTION  |
| <i>Gabarap</i>                                             | TTCTTGATCCGGAAGCGAAT           | CTGGTACAGCTGACCCATCG   |
| <i>Wipi2</i>                                               | TTGATGCAAGTGGGACCAAG           | GGAGCAGATGCTCACACACC   |
| <i>Musa1/Fbxo30</i>                                        | TCGTGGAATGGTAATCTTGC           | CCTCCCGTTTCTCTATCACG   |
| <i>MAFbx/Atrogin-1/Fbxo32</i>                              | TGGGTGTATCGGATGGAGAC           | TCAGCCTCTGCATGATGTTC   |
| <i>MuRF-1/Trim63</i>                                       | TGCTTGGCACTTGAGAGGAA           | AGAAGCTGGGCTTCATCGAG   |
| $\beta$ 5/ <i>Psmb5</i>                                    | GTACAAAGGCATGGGGCTGT           | CGGTCCCAGAGATCCTGTTC   |
| $\beta$ 1/ <i>Psmb6</i>                                    | GCAGTTCCTGCAATGCTC             | CAACGTGGCAATGGTGAAC    |
| $\beta$ 2/ <i>Psmb7</i>                                    | TTGTCGCAGGAATGCTGTCT           | CAGCAACAACCATCCCTTCA   |
| $\beta$ 5i/ <i>Psmb8</i>                                   | TACCTGCTTGGCACCATGTC           | CGTTCCCCATTCCGAAGATA   |
| $\beta$ 1i/ <i>Psmb9</i>                                   | GGACGGAAGAAGTCCACACC           | GTGCAGAGGGGAGAGCTTGT   |
| $\beta$ 2i/ <i>Psmb10</i>                                  | GCTGCGGACACTGAGATGAC           | TTGGTACCGGAAAAGCGTCT   |
| <i>Psmg2</i>                                               | AGCTGCGCAGTACTCCCTTC           | ATCTCAGGGATGCACCGACT   |
| <i>MyoG</i>                                                | GCACTGGAGTTCGGTCCCAA           | TATCCTCCACCGTGATGCTG   |
| <i>Myh1</i>                                                | TTCCTCCTTCCAGACCGTGT           | AGGACCAGTTCGTGCTCCAT   |
| <i>Myh2</i>                                                | ACTTTGGCACTACGGGGAAAC          | CAGCAGCATTTCGATCAGCTC  |
| <i>Myh4</i>                                                | CTTTGCTTACGTCAGTCAAGGT         | AGCGCCTGTGAGCTTGATAA   |
| <i>Myh8</i>                                                | AAGAACCCAGGCGGTCTGTA           | CGCGGACGTTGTACTION     |

|                                          |                       |                       |
|------------------------------------------|-----------------------|-----------------------|
| Cathepsin L                              | CGGGTTGCCTAGAAGGACAG  | ACAGCCCTGATTGCCTTGAT  |
| 18S                                      | TGCGGTTTAGCGTCGGTGTC  | CCAAGTGGCCAAAGCGTA    |
| $\beta$ -Actin                           | AACCGTGAAAAGATGACCCAG | CACAGCCTGGATGGCTACGTA |
| Cyclophilin                              | GCGTCTCTTCGAGCTGTTT   | CTGGCACATGAATCCTGGAA  |
| Gapdh                                    | AAGAAGGTGGTGAAGCAGGCG | ACCAGGAAATGAGCTTGACAA |
| <b>Human primer sequences</b>            |                       |                       |
| <i>D230025D16Rik</i><br>( <i>Mytho</i> ) | TGGGCAATGTCTATGCTGAG  | CTTTGTGTGGAGAGCCAAGC  |
| Cyclophilin                              | CATACGGGTCCTGGCATC TT | AACACCACATGCTTGCCATC  |

**Table S6: Software and Algorithms**

| <b>Software and Algorithms</b>                               | <b>Source</b> | <b>Identifier</b>                                                                                                     |
|--------------------------------------------------------------|---------------|-----------------------------------------------------------------------------------------------------------------------|
| GraphPad Prism 9.4.0                                         | N/A           | <a href="https://www.graphpad.com/scientific-software/prism/">https://www.graphpad.com/scientific-software/prism/</a> |
| Igor Pro (Version 8)                                         | N/A           | WaveMetrics                                                                                                           |
| (Fiji) ImageJ                                                | N/A           | <a href="https://fiji.sc/">https://fiji.sc/</a>                                                                       |
| BioRender                                                    | N/A           | BioRender.com                                                                                                         |
| Affymetrix®<br>Transcriptome Analysis<br>Console (TAC) 4.0.1 | N/A           | Thermo Fisher Scientific                                                                                              |
| Metascape                                                    | N/A           | <a href="https://metascape.org/gp/index.html#/main/step1">https://metascape.org/gp/index.html#/main/step1</a>         |
| ClustVis                                                     | N/A           | <a href="https://biit.cs.ut.ee/clustvis/">https://biit.cs.ut.ee/clustvis/</a>                                         |
| ImageLab                                                     | N/A           | Bio-Rad Laboratories                                                                                                  |
| Zeiss ZEN 3.5 image<br>acquisition software                  | N/A           | Carl Zeiss                                                                                                            |
| Funrich software                                             | N/A           | <a href="http://www.funrich.org">http://www.funrich.org</a>                                                           |
| Dynamic Muscle Control<br>and Analysis Software              | N/A           | Aurora Scientific Inc                                                                                                 |
| GEOexplorer                                                  | N/A           | <a href="https://geoexplorer.rosalind.kcl.ac.uk">https://geoexplorer.rosalind.kcl.ac.uk</a>                           |
| Mitofun                                                      | N/A           | <a href="https://zenodo.org/record/7510439#.Y9COzi3pOXI">https://zenodo.org/record/7510439#.Y9COzi3pOXI</a>           |
